1 **Title**

2 Typical and disrupted brain circuitry for conscious awareness in full-term and preterm infants

3

4 **Authors**

5 Huiqing Hu<sup>a</sup>, Rhodri Cusack<sup>a</sup>, Lorina Naci<sup>ab\*</sup>

6

7 **Affiliations**

8 <sup>a</sup>Trinity College Institute of Neuroscience, School of Psychology, Trinity College Dublin,

9 Dublin, Ireland.

10 <sup>b</sup>Global Brain Health Institute, Trinity College Dublin, Dublin, Ireland

11

12

13

14 **\* Corresponding author:**

15 Lorina Naci

16 School of Psychology

17 Trinity College Institute of Neuroscience

18 Global Brain Health Institute

19 Trinity College Dublin

20 Dublin, Ireland

21 Telephone: +353 (0)87 688 5642

22 Email: [nacil@tcd.ie](mailto:nacil@tcd.ie)

23

24

## 25 **Abstract**

26 One of the great frontiers of consciousness science is understanding how early consciousness  
27 arises in the development of the human infant. The reciprocal relationship between the  
28 default mode network (DMN) and frontoparietal networks — the dorsal attention network  
29 (DAN) and executive control network (ECN) — is thought to facilitate integration of  
30 information across the brain and its availability for conscious access to a wide set of mental  
31 operations. It remains unknown whether the brain mechanism of conscious awareness is  
32 instated in infants from birth. To address this gap, we asked what the impact of prematurity  
33 and neonate age is on the development the default mode and fronto-parietal networks, and of  
34 their reciprocal relationship. To address these questions, we used the Developing Human  
35 Connectome Project (dHCP), a unique Open Science project which provides a large sample  
36 of neonatal functional Magnetic Resonance Imaging (fMRI) data with high temporal and  
37 spatial resolution. Resting state fMRI data for full-term neonates ( $N = 282$ , age  $41.2 \text{ w} \pm 12$   
38  $\text{d}$ ), and preterm neonates scanned at term-equivalent age (TEA) ( $N = 73$ ,  $40.9 \text{ w} \pm 14.5 \text{ d}$ ), or  
39 before TEA ( $N = 73$ ,  $34.6 \text{ w} \pm 13.4 \text{ d}$ ) were obtained from the dHCP, and for a reference  
40 adult group ( $N = 176$ ,  $22 - 36$  years), from the Human Connectome Project. For the first  
41 time, we show that the reciprocal relationship between the DMN and DAN was present at  
42 full-term birth or TEA. Although different from the adult networks, the DMN, DAN and  
43 ECN were present as distinct networks at full-term birth or TEA, but premature birth  
44 disrupted network development. By contrast, neonates before TEA showed dramatic  
45 underdevelopment of high-order networks. Only the DAN was present as a distinct network  
46 and the reciprocal network relationship was not yet formed. Our results suggest that, at full-  
47 term birth or by term-equivalent age, infants possess key features of the neural circuitry that  
48 enables integration of information across diverse sensory and high-order functional modules,  
49 giving rise to conscious access. Conversely, they suggest that this brain infrastructure is not  
50 present before infants reach term-equivalent age. These findings improve understanding of  
51 the ontogeny of high-order network dynamics that support conscious awareness, and of their  
52 disruption by premature birth.

53

54 **Keywords.** Neonate, premature birth, brain development, high-order networks, conscious  
55 awareness

56

## 57 **Introduction**

58 It remains unknown whether conscious awareness is present in newborn infants and whether  
59 its development is affected by premature birth. In healthy human adults, consciousness is  
60 clinically defined and measured by examining two distinct dimensions: arousal and  
61 awareness (Laureys et al., 2004). ‘Arousal’ is measured by assessing spontaneous eye  
62 opening, sleep-wake cycles and other systemic fluctuations in the ability to engage with the  
63 environment. ‘Awareness’ is assessed by examining the ability to wilfully to respond to  
64 commands behaviourally and/or through language, as well as the ability to report on mental  
65 states pertaining to oneself or the environment (Naci et al., 2014; Mehling et al., 2009; Clare  
66 et al., 2005). There is no question that newly born infants, or neonates, have arousal, e.g.,  
67 they cry and have sleep-wake cycles. However, the extent to which neonates can consciously  
68 process information about themselves and their environment remains unknown. Highly  
69 relevant to understanding neonate awareness is Damasio’s (2000) distinction between a ‘core  
70 awareness’, or a basic integrated experience of the current moment, and an ‘extended  
71 awareness’, made possible by the accumulation of autobiographical memories that allow  
72 creation of an internal world and projection beyond the present. This is echoed in the  
73 distinction between a ‘minimal’ and ‘longitudinal’ self, proposed by others. The ‘minimal’  
74 self is immediate (Gallagher, 2000) and comprises awareness of body boundaries and  
75 position, facial features and body size, visceral states, agency, mental states and online  
76 behaviour (Sturm et al., 2017), whereas the ‘longitudinal’ self, requires the presence of  
77 episodic autobiographical memory (i.e., memories of past events) and semantic self-  
78 knowledge (i.e., knowledge of one’s own traits) and is extended across time (Seeley and  
79 Sturm, 2006).

80

81 Although studies on neonate awareness are scarce, a few suggest ‘minimal’ awareness from  
82 birth. Newborns perform some forms of stimulus discrimination early after birth, including  
83 distinguishing their body (12 to 103 hours after birth; Filippetti et al., 2013), and their own  
84 cry from those of other newborns’ (within one day after birth; Martin et al., 1982; Simner et  
85 al., 1971), their mother’s voice from a stranger’s (within 12 hours – 3 days after birth;  
86 Ockleford et al., 1988; Querleu et al., 1984; DeCasper et al., 1980), and discriminating facial  
87 expressions of happiness from disgust (2 days after birth; Addabbo et al., 2018). Although  
88 prima facia, these studies suggest ‘minimal’ awareness in neonates, these behaviours could be  
89 due to certain stimuli being primed in the early days of life or even in the womb, or due to the  
90 physical properties of the stimuli themselves. For example, the mother’s voice is very

91 familiar to the neonate, so any preferential responses could be due to familiarity rather than  
92 understanding the meaning and significance of the mother figure. Similarly, the response to  
93 expressions of disgust, could be a pre-conscious reaction to aversive stimuli (Ruffman et al.,  
94 2019). Critically, the lack of language and the very limited motor function preclude self-  
95 report or behavioural responses, and, thus, prevent the assessment of infant awareness from  
96 the first days of life. To circumvent these limitations, in present study we followed a different  
97 strategy.

98

99 We asked a foundational question to understanding the *capacity* for conscious experiences,  
100 that of whether or not the brain mechanisms of conscious awareness are instated in neonates.  
101 We focused in particular on the development of the fronto-parietal and default mode (DMN)  
102 networks, of their reciprocal relationship, and how they are impacted by premature birth and  
103 neonate age. Prominent theories of consciousness, including the Global Neuronal Workspace  
104 Theory (Mashour et al., 2020; Dehaene et al., 2011) and the Integrated Information Theory  
105 (Tononi, 2004) converge on the principle that consciousness requires integration of  
106 information from discrete but interconnected modules across the brain. Adult functional  
107 neuroimaging studies have identified the fronto-parietal and DMN networks as two such  
108 distinct cortical systems that support consciousness and play complementary roles in  
109 information integration. Myriad neuro-psychological and neuroscientific studies show that  
110 fronto-parietal regions — comprising the dorsal attention (DAN) and executive control  
111 (ECN) networks — are critical for stimulus-driven high-order cognition (Ptak, 2012;  
112 Woolgar et al., 2010; Duncan et al., 2010; Elliott, 2003; Shallice, 1988), and recent work  
113 suggests they facilitate awareness of external stimuli (Huang et al., 2020; Demertzi et al.,  
114 2013; Vanhaudenhuyse et al., 2011). By contrast, the DMN has been primarily implicated in  
115 self-referential processing (Qin and Northoff, 2011; Andrews-Hanna et al., 2010; Schneider  
116 et al., 2008; Beer, 2007; Buckner et al., 2007; D'Argembeau et al., 2005; Wicker et al., 2003;  
117 Gusnard et al., 2001) and self-awareness (Demertzi et al., 2013; Vanhaudenhuyse et al.,  
118 2011), and more recently in context processing (Smith et al., 2018; Vatansever et al., 2018;  
119 Margulies et al., 2016). Importantly, the fronto-parietal network and DMN share a reciprocal  
120 relationship, where they are not simultaneously active, i.e., are anticorrelated, or exhibit low  
121 correlation of functional time-courses relative to other brain network pairings. This  
122 relationship is abolished when consciousness is extinguished, irrespective of condition, e.g.,  
123 whether during deep anaesthesia under various pharmacological manipulations or after severe

124 brain injury (Huang et al., 2020; Haugg et al., 2018; Bonhomme et al., 2012), suggesting that  
125 it tracks the presence of conscious awareness.

126

127 Whether the DMN, DAN and ECN and their reciprocal relationship are developed by birth  
128 and whether they are affected by prematurity, remain poorly understood. To assess the  
129 literature, we conducted a literature search with key words, ‘functional network’ or  
130 ‘functional connectivity’, ‘infant’ or ‘newborn’ or ‘neonatal’, and “fMRI” that resulted in 19  
131 neonate studies summarized in Table S1. While the three primary sensory and motor  
132 networks were consistently reported in neonates (Cui et al., 2017; Gao et al., 2015a, 2015b;  
133 Doria et al., 2010; Fransson et al., 2009; Fransson et al., 2007), findings were inconsistent on  
134 the presence of high-order networks, including the DMN, DAN, ECN. Some resting state  
135 functional magnetic resonance imaging (rs-fMRI) studies (Gao et al., 2015a, 2009; Smyser et  
136 al., 2010; Fransson et al., 2007) found no evidence for the presence of these networks until  
137 the end of the first year. Fransson et al. (2007) found that the DMN in preterm neonates was  
138 fragmented into an anterior and posterior part. Similarly, Gao et al., (2009) reported that  
139 although the two main hubs of DMN (i.e., the ventral/dorsal medial prefrontal cortex and  
140 posterior cingulate/retrosplenial cortex) were consistently observed in 2-week-olds, 1-year-  
141 old and 2-year-olds, other aspects of the DMN (i.e., the inferior parietal lobule, lateral  
142 temporal cortex, and hippocampus regions) were not found in 2-week-olds. A similar pattern  
143 was also reported for the DAN and ECN (Gao et al., 2015b; Fransson et al., 2009). By  
144 contrast, other rs-fMRI studies (Linke et al., 2018; He et al., 2015, 2016; Doria et al., 2010)  
145 support the idea that these networks have already emerged in neonates. For instance, Doria et  
146 al. (2010) found that both primary and high-order networks were present in full-term and  
147 preterm neonates scanned at term-equivalent age (TEA: 37 – 42 weeks of postmenstrual age).  
148 He et al. (2015) detected a fronto-parietal network, comprising the frontal gyrus and inferior  
149 parietal cortex, and a second one, comprising the anterior cingulate cortex, medial prefrontal  
150 cortex, superior/middle frontal gyrus, in preterm neonates. Linke et al. (2018) found that both  
151 the ECN and DMN were present even in neonates with perinatal brain injuries, both full-term  
152 and preterm neonates scanned at TEA.

153

154 Several factors may contribute to these divergent results. Due to methodological and  
155 technical challenges, the incipient field of infant neuroimaging has, to date, not adhered to  
156 unified testing protocols. The aforementioned studies employ vastly different sample sizes  
157 (e.g., ranging from N = 11 to 143), different MR field strengths (e.g., 1.5T vs 3T) yielding

158 different spatial and temporal resolutions (Weiskopf et al., 2006; Triantafyllou et al., 2005),  
159 different motion artifact control methods, and lack age-specific structural brain templates for  
160 neonates. The multitude of different methodologies across previous studies render it  
161 impossible to conclude, in light of inconsistent results, whether the DMN, DAN and ECN are  
162 already present at birth or not. Moreover, to the best of our knowledge, only one study to date  
163 (Gao et al., 2013) has investigated whether the reciprocal relationship between these three  
164 high-order networks is developed in early infancy. Gao et al. (2013) reported that the  
165 anticorrelated interaction between the DMN and DAN was absent at birth, but became  
166 apparent at one year of age. However, this study had a relatively small number of full-term  
167 neonates ( $N = 51$ ) and no preterm neonates, which may have reduced the power to detect  
168 effects of interest. To address aforementioned limitations of previous studies, we used data  
169 from the open-source Developing Human Connectome Project (dHCP). The dHCP conferred  
170 several advantages, including a robust sample size ( $N = 282$ ), 3T MRI, multiband echo-  
171 planar imaging that significantly improves temporal resolution and signal-to-noise (Zhang et  
172 al., 2019), registration to more accurate week-to-week neonate structural templates, and  
173 significant improvements in motion correction and signal-to-noise ratio relative to previous  
174 studies (see Methods for further details).

175  
176 We investigated the development of the DMN, DAN and ECN and of their relationship in  
177 neonates delivered and scanned at full-term ( $N = 282$ ) relative to adults ( $N = 176$ ). To  
178 understand the effect of neonate age on these networks, we also assessed preterm neonates.  
179 To deconfound the effect of the chronological age at the time of assessment from the effect of  
180 premature birth (Bhutta et al., 2002), we included two groups of preterm neonates: the first  
181 ( $N = 73$ ) were scanned at TEA, and the second ( $N = 73$ ) before TEA. We reasoned that any  
182 differences between neonates born and scanned at full-term and preterm neonates scanned at  
183 TEA would reflect effects of premature birth, while controlling for neonate age. Conversely,  
184 any differences between preterm neonates scanned at TEA and those scanned before TEA  
185 would reflect effects of neonate age.

186  
187  
188  
189  
190

191 **Methods**

192

193 **Participants**

194 *Neonates.* The neonate data were from the second (2019) dHCP public data release  
195 (<http://www.developingconnectome.org/second-data-release/>). All neonates were scanned at  
196 the Evelina Newborn Imaging Centre, Evelina London Children's Hospital. Ethical approval  
197 was obtained from the UK's National Research Ethics Committee and parental informed  
198 consent was obtained prior to imaging. *Full-term neonates.* We used 282/343 scans in the  
199 full-term neonates (gestational age (GA) at birth = 40.0 weeks  $\pm$  8.6 days; PMA at scan =  
200 41.2 weeks  $\pm$  12.0 days; 160 males) after quality control procedures. *Preterm neonates.* We  
201 used 73 scans in both the preterm neonates scanned at TEA (GA at birth = 32.0 weeks  $\pm$  25.6  
202 days; PMA at scan = 40.9 weeks  $\pm$  14.5 days; 41 males) and preterm neonates scanned before  
203 TEA (GA at birth = 32.5 weeks  $\pm$  13.4 days; PMA at scan = 34.6 weeks  $\pm$  13.4 days; 50  
204 males). Of the 47 preterm neonates scanned both at and before TEA, 10 were discarded  
205 because of excessive movement of either one of the two scans, resulting in 37 paired scans  
206 (GA at birth = 31 weeks  $\pm$  6.8 days; PMA at first scan = 34 weeks  $\pm$  1.3 days; PMA at second  
207 scan: 40 weeks  $\pm$  6.9 days; 24 males). Further details in Figure 1, and SI file and Table S2.  
208  
209 *Adults.* As a reference adult group, we used a subset (N = 176; 22 – 36 years; 77 males) of  
210 high quality data from the final release of the Washington University-Minnesota Consortium  
211 of Human Connectome Project (HCP) selected by Ito et al. (2020) ([https://github.com/ito-](https://github.com/ito-takuya/corrQuench)  
212 [takuya/corrQuench](https://github.com/ito-takuya/corrQuench)). For details of study procedures see Van Essen et al. (2013).

213

214 *Figure 1 about here please*

215

216

217 **Data acquisition and pre-processing**

218 *dHCP.* Data were acquired on a 3T Philips Achieva with a dedicated neonatal imaging  
219 system including a neonatal 32-channel phased-array head coil. Fifteen minutes of high  
220 temporal and spatial resolution rs-fMRI data were acquired using a multislice gradient-echo  
221 echo planar imaging (EPI) sequence with multiband excitation (TE = 38 ms; TR = 392 ms;  
222 MB factor = 9x; 2.15 mm isotropic, 2300 volumes). In addition, single-band EPI reference  
223 (sbref) scans were also acquired with bandwidth-matched readout, along with additional spin

224 echo EPI acquisitions with 4xAP and 4xPA phase-encoding directions. To correct  
225 susceptibility distortion in rs-fMRI data, field maps were also obtained from an interleaved  
226 (dual TE) spoiled gradient-echo sequence (TR = 10 ms; TE1 = 4.6 ms; TE2 = 6.9 ms; flip  
227 angle (FA) = 10°; 3 mm isotropic in-plane resolution, 6mm slice thickness). High-resolution  
228 T1- and T2-weighted anatomical imaging were also acquired in the same scan session, with a  
229 spatial resolution of 0.8 mm isotropic. For T1w image: TR = 4795 ms and the field of view  
230 (FOV) = 145 × 122 × 100 mm. For T2w image: TR = 12000 ms, TE = 156 ms and the FOV =  
231 145 × 122 × 100 mm.

232

233 The dHCP rs-fMRI data were pre-processed by dHCP group using the project's in-house  
234 pipeline optimized for neonatal imaging. See SI and Fitzgibbon et al. (2020) for full details.  
235 In order to reduce signal artefacts related to head motion, the cardiorespiratory fluctuations  
236 and multiband acquisition, the 24 extended rigid-body motion parameters together with  
237 single-subject ICA noise components were regressed out. To further reduce the effect of  
238 motion on functional connectivity measures, motion-outlier volumes were identified, and a  
239 scrubbing procedure was applied to retain a continuous sub-sample of the data (~70%) with  
240 the lowest motion for each participant. The subjects who still had a high level of motion after  
241 scrubbing procedure were excluded from further analyses. We discarded the first 5 volumes  
242 to allow for adaptation to the environment and equilibrium of the MR signal at first. Then,  
243 motion outliers were identified from the remaining 2295 volumes. Volumes with DVARS  
244 (the root mean square intensity difference between successive volumes) higher than 1.5  
245 interquartile range above the 75th centile, after motion and distortion correction, were  
246 considered motion outliers. Then, a continuous sub-sample of 1600 volumes with the  
247 minimum number of motion outliers was retained for each subject. Subjects with more than  
248 160 motion-outlier volumes (10% of the cropped dataset) in the continuous subset were  
249 labelled 'high level of motion' and excluded entirely. Thus, 8 preterm neonates scanned  
250 before TEA, 14 preterm neonates scanned at TEA and 61 full-term neonates were excluded.  
251 In addition, we performed a temporal low-pass filter (0.08 Hz low-pass cutoff) on the pre-  
252 processed dHCP rs-fMRI to conduct functional connectivity (FC) analyses, as previous  
253 studies (Zuo et al., 2010; Salvador et al., 2008) found that oscillations were primarily  
254 detected within grey matter in 0.01 – 0.08 Hz. Figure S1a provides a schematic of the  
255 processing steps for dHCP fMRI data.

256



257 *HCP*. Data were acquired on a customized 3T Siemens “Connectome Skyra” with a 32-  
258 channel head coil. Resting state images were collected using gradient-echo EPI sequence: TR  
259 = 720 ms; TE = 33.1 ms; FA = 52°; FOV = 208 × 180 mm (RO × PE), slice thickness = 2  
260 mm, 72 slices, 2.0 mm isotropic voxels, 1200 volumes per run. rs-fMRI data were pre-  
261 processed by HCP group. See SI and Van Essen et al. (2013) for full details.

262

## 263 **Data analyses**

264 *Network definition*. We used a theory and meta-analyses driven node-based approach to  
265 network mapping. Nineteen regions of interest (8-mm radius spheres) for the three networks  
266 (Table S3), DMN, DAN and ECN, were created based on well-established landmark regions  
267 of interest (ROIs) defined in Raichle (2011). This method also helps to relate findings to our  
268 previous findings based on the same parcellation template (Naci et al., 2018; Haugg et al.,  
269 2018). See SI for details of alignment to neonate week-to-week structural templates and full  
270 details.

271

272 *Functional connectivity (FC)*. FC between ROIs was assessed by calculating the Pearson  
273 correlation of pre-processed time-courses, and z scored by using the Fisher-z transformation.  
274 At the individual level, within-network FC were obtained by averaging the FC between ROIs  
275 belonging to same network and between-network FC by averaging the FC between ROIs of  
276 each network to the others. For all between-group comparisons, the ROI-level FC within each  
277 subject was normalized to facilitate a focus on the FC-patterns between groups rather than  
278 potentially differing FC strength between the groups (Eyre et al., 2020; Smyser et al., 2016).  
279 ANOVAs and *t* tests were used to explore within and between group differences. Bonferroni  
280 correction for multiple comparison was applied to all statistical results.

281

282 *Comparison of neonates and adults*. General linear models (GLM) were used to test for  
283 group differences in FC within DMN, DAN or ECN while controlling for head motion, as we  
284 found neonates had significantly higher head motion than adults (SI, Figure S2, S3).

285 Hierarchical clustering analysis (Ripley et al., 2007; Rasmussen et al., 1992) and non-metric  
286 multidimensional scaling were used to capture network structure, and visualize the similarity  
287 of ROI responses in neonates and adults. See SI for further details.

288

289 *Comparison of neonate groups*. To investigate the effect of preterm birth, while controlling  
290 for age at scan, on network development, we compared the FC within each network and

291 between each pair of networks, between preterm neonates scanned at TEA and full-term  
292 neonates. Head motion was not included as covariate, since we did not observe significant  
293 difference between the two groups (Figure S3). To investigate the effect of neonate age,  
294 while controlling for prematurity, the same preterm neonates scanned before and at TEA (N =  
295 37) were used.

296

297

## 298 **Results**

299

### 300 **The development of high-order networks in neonates**

301 For full-term neonates, a  $2 \times 3$  repeated measure ANOVA [type of FC (within-network,  
302 between-network)  $\times$  network (DMN, DAN, ECN)] showed a significant main effect of type  
303 of FC ( $F(1, 281) = 766.14, p < 0.001$ ), which was driven by higher overall connectivity for  
304 the within- relative to between-network connectivity ( $t(281) = 27.63, p < 0.001$ ) (Figure 2a).  
305 We also found a main effect of network ( $F(2, 562) = 16.29, p < 0.001$ ), which was driven by  
306 lower overall connectivity for the ECN relative to the DMN ( $t(281) = -3.06, p < 0.005$ ) and  
307 DAN ( $t(281) = -5.84, p < 0.001$ ). A significant interaction effect of type of FC by network ( $F$   
308  $(1.96, 550.18) = 81.44, p < 0.001$ ) was driven by smaller difference between within- and  
309 between-network connectivity in the DMN relative to the DAN ( $t(281) = -4.41, p < 0.001$ ),  
310 and in the ECN relative to the DMN ( $t(281) = -8.88, p < 0.001$ ), and the DAN ( $t(281) = -$   
311  $11.86, p < 0.001$ ). Paired- $t$  tests showed significantly higher within- to between-network FC  
312 for each network (DMN:  $t(281) = 17.32, p < 0.001$ ; DAN:  $t(281) = 21.05, p < 0.001$ ; ECN:  $t$   
313  $(281) = 5.51, p < 0.001$ ) (Figure 2a). This suggested that the coherence of nodes within each  
314 network was stronger than with the other networks' nodes, in other words, that each of the  
315 three networks was differentiated as a cohesive unit, distinct from the other networks.

316

317 For preterm neonates scanned at TEA, a similar  $2 \times 3$  repeated measure ANOVA showed a  
318 significant main effect of FC type ( $F(1, 72) = 87.04, p < 0.001$ ), which was driven by higher  
319 overall connectivity within- relative to between-network connectivity ( $t(72) = 9.35, p <$   
320  $0.001$ ) (Figure 2b). A significant interaction effect of type of FC by network ( $F(1.81, 130.23)$   
321  $= 6.03, p < 0.005$ ), was driven by a smaller difference between within- and between-network  
322 connectivity in ECN relative to the DAN ( $t(72) = -2.96, p < 0.005$ ). Paired- $t$  tests showed  
323 significantly higher within- relative to between-network FC for each network (DMN:  $t(72) =$

324 6.20,  $p < 0.001$ ; DAN:  $t(72) = 8.05$ ,  $p < 0.001$ ; ECN:  $t(72) = 3.46$ ,  $p < 0.001$ ) (Figure 2b),  
325 suggesting that the DMN, DAN, and ECN were distinct from the one another in preterm  
326 neonates scanned at TEA.

327 For preterm neonates scanned before TEA, a similar 2 x 3 repeated measure ANOVA showed  
328 a significant main effect of type of FC ( $F(1, 72) = 16.80$ ,  $p < 0.001$ ), which was driven by  
329 higher overall connectivity for the within- relative to between-network connectivity ( $t(72) =$   
330  $4.12$ ,  $p < 0.001$ ) (Figure 2c). A main effect of network ( $F(1.83, 131.64) = 22.15$ ,  $p < 0.001$ )  
331 was driven by lower overall connectivity for the DMN ( $t(72) = -3.98$ ,  $p < 0.001$ ) and ECN ( $t$   
332  $(72) = -6.45$ ,  $p < 0.001$ ) relative to the DAN (Figure 2c). A significant interaction effect of  
333 type of FC by network ( $F(2, 144) = 33.78$ ,  $p < 0.001$ ) was driven by smaller difference  
334 between within- and between-network connectivity in DMN relative to that in DAN ( $t(72) =$   
335  $-3.93$ ,  $p < 0.001$ ), and in ECN relative to that in DMN ( $t(72) = -4.32$ ,  $p < 0.001$ ) and DAN ( $t$   
336  $(72) = -8.21$ ,  $p < 0.001$ ). Paired- $t$  tests showed significantly higher within- relative to  
337 between-network FC for DAN ( $t(72) = 7.73$ ,  $p < 0.001$ ), but significantly lower within-  
338 network FC compared to between-network FC for ECN ( $t(36) = -3.86$ ,  $p < 0.001$ ) (Figure  
339 2c), suggesting that only the DAN was distinct from the other two networks in preterm  
340 neonates scanned before TEA.

341  
342 In summary, these results suggested that the DMN, DAN and ECN were present in full-term  
343 and preterm neonates scanned at TEA, but only the DAN was formed as a distinct network in  
344 the preterm neonates scanned before TEA. Furthermore, the DAN was the most cohesive  
345 network in all three neonate groups.

346

347 *Figure 2 about here please*

348

349

### 350 **The development of the reciprocal relationship between the DMN and fronto-parietal** 351 **networks in neonates**

352 In full-term neonates, a one-way ANOVA with repeated measures for between-network FC  
353 (DMN–DAN, DMN–ECN, DAN–ECN) showed a significant main effect ( $F(1.98, 555.60) =$   
354  $27.11$ ,  $p < 0.001$ ), which was driven by significantly lower FC in the DMN–DAN relative to  
355 DMN–ECN ( $t(281) = -7.79$ ,  $p < 0.001$ ) and DAN–ECN ( $t(281) = -4.64$ ,  $p < 0.001$ ) pairings.  
356 (Figure 3a). Similarly, to the adult data (see SI Results, Figure S4), the lower DMN–DAN  
357 FC, relative to the other pairings suggested that the reciprocal relationship between the DMN

358 and DAN was present in full-term neonates. In preterm neonates scanned at TEA, a similar  
359 main effect ( $F(1.87, 134.45) = 11.93, p < 0.001$ ), was driven by significantly lower FC in the  
360 DMN–DAN compared to DMN–ECN ( $t(72) = -4.78, p < 0.001$ ) and DAN–ECN ( $t(72) = -$   
361  $4.20, p < 0.001$ ) pairings (Figure 3b), and suggested that the reciprocal relationship between  
362 the two networks was present in preterm neonates scanned at TEA. In preterm neonates  
363 scanned before TEA, a significant main effect ( $F(2, 144) = 4.86, p = 0.009$ ), was driven by  
364 lower FC in DMN–ECN relative to DMN–DAN ( $t(72) = -2.88, p = 0.005$ ) and DAN–ECN  
365 ( $t(72) = -2.94, p < 0.005$ ) pairings (Figure 3c). This is consistent with aforementioned results  
366 suggesting that the DMN and ECN are not yet developed as distinct networks in this group  
367 (Figure 2c). Furthermore, these results suggested that, by contrast to the full-term and preterm  
368 neonates scanned at TEA, the relationships between the three networks in preterm neonates  
369 scanned before TEA do not yet resemble the adult pattern (see SI, Figure S5). In summary,  
370 these results suggested that the reciprocal relationship between the DMN and DAN has  
371 started to develop in full-term neonates and preterm neonates scanned at TEA, but not in  
372 preterm neonates scanned before TEA.

373

374 *Figure 3 about here please*

375

376

### 377 **Comparison of neonate and adult networks**

378 Visual inspection of the connectivity matrices (Figure 4) suggested that each neonate group  
379 had less cohesive networks (lower within relative to between-network connectivity) than the  
380 adult group. To investigate specifically how the three networks in neonates differed to those  
381 of adults, we compared the within- (Figures 5, 6) and between-network (Figure 7)  
382 connectivity in the neonate and adult groups.

383

384 *Figure 4 about here please*

385

386 A GLM comparing adults and full-term neonates, including head motion as a covariate (SI,  
387 Figure S3), showed a significant main effects of group for all of the three networks (DMN:  $F$   
388  $(1, 455) = 75.62, p < 0.001$ ); DAN:  $F(1, 455) = 333.33, p < 0.001$ ); ECN:  $F(1, 455) =$   
389  $135.88, p < 0.001$ ); Figure 5a-i), which was driven by significantly higher within-network FC  
390 in the adults relative to full-term neonates. Hierarchical clustering analyses showed that, the  
391 adults' network nodes grouped neatly into the a-priori postulated three distinct clusters

392 (Raichle 2011), each comprising all the ROIs belonging to that network (Table S3). By  
393 contrast, in the full-term neonates, the ROIs clustered into groups that were inter-mixed  
394 between the three networks (Figure 5a-ii). Similarly, for the preterm neonates scanned at  
395 TEA, we found significant main effects of group for all of the three networks (DMN:  $F(1, 246) = 90.16, p < 0.001$ ); DAN:  $F(1, 246) = 252.32, p < 0.001$ ); ECN:  $F(1, 246) = 42.40, p < 0.001$ ); Figure 5b-i), again driven by significantly higher within-network FC in the adult  
398 group. Unlike the adult group, preterm ROIs clustered into groups inter-mixed between the  
399 three networks (Figure 5b-ii). Consistent with the other two groups' results, for the preterm  
400 neonates scanned before TEA, we found significant main effects of group for all of the three  
401 networks (DMN:  $F(1, 246) = 145.15, p < 0.001$ ); DAN:  $F(1, 246) = 276.15, p < 0.001$ );  
402 ECN:  $F(1, 246) = 218.91, p < 0.001$ ); (Figure 5c-i)), which were driven by significantly  
403 higher within-network FC in adults, and ROI clusters that did not adhere to network identity  
404 (Figure 5c-ii).

405

406 *Figure 5 about here please*

407

408 Multidimensional scaling analyses further confirmed these results, by showing that the adult  
409 ROIs formed three distinct cluster conforming to network identify (Figure 6a), distanced  
410 from one another in representational space. By contrast, each network's ROIs in the neonate  
411 groups formed less distinct clusters, i.e., clusters were more closely grouped together, and  
412 their separability as distinct clusters was reduced with neonate age. The preterm neonates  
413 scanned before TEA showed the most intermingling of ROIs across the three networks in this  
414 two-dimensional manifold (Figure 6d).

415

416 *Figure 6 about here please*

417

418 In summary, these results suggested that although the three networks were present in full-  
419 term and preterm neonates scanned at TEA, and the DAN in preterm neonates scanned before  
420 TEA, their coherence was lower and structure less well-organised than the canonical adult  
421 networks. This is consistent with previous studies showing that brain networks continue to  
422 develop from birth onwards (Turk et al., 2019; Keunen et al., 2017; Cusack et al., 2016;  
423 Doria et al., 2010; Limperopoulos et al., 2005). As expected, the reciprocal relationship  
424 between the DMN and fronto-parietal networks was also weaker in neonates relative to adults  
425 (Figure 7) (see SI Results for full details).

426

*Figure 7 about here please*

427

428

429 **The effect of prematurity on network development and their relationship**

430 Comparison of network FC in full-term relative to preterm neonates scanned at TEA showed  
431 significantly lower FC within the DMN ( $t(353) = -2.64, p = 0.009$ ) and the DAN ( $t(353) = -$   
432  $2.63, p = 0.009$ ) in the preterm group (Figure 8a). In addition, we observed higher FC  
433 between the DAN and ECN ( $t(353) = 2.83, p = 0.005$ ) in preterm neonates. These results  
434 suggested that, by term-equivalent age, preterm birth is associated with lower DMN and  
435 DAN network coherence, and lower differentiation of the DAN and ECN from one another,  
436 relative to full-term birth.

437

438

*Figure 8 about here please*

439

440

441 **The effect of premature neonate age on network development and their relationship**

442 We found significantly lower FC within the ECN ( $t(36) = -4.28, p < 0.001$ ) and higher  
443 DMN–DAN FC ( $t(36) = 4.39, p < 0.001$ ), suggesting lower ECN network coherence and  
444 lower functional differentiation between the DMN and DAN, for preterm neonates scanned  
445 before TEA relative to the same group scanned at TEA (Figure 8b). Thus, these results  
446 suggested that neonate age, and particularly, development up to term-equivalent age, is a  
447 significant factor for the maturation of the ECN and of the development of the reciprocal  
448 relationship between the DMN and the DAN.

449

## 450 **Discussion**

451 In this study, we asked whether infants have the capacity for conscious experiences. The lack  
452 of language and wilful motoric output present major barriers to consciousness science in  
453 neonates. To sidestep these limitations, we examined whether or not the brain circuitry of  
454 conscious awareness is developed at birth. In particular, we focused on the impact of  
455 prematurity and early infant age on the development the default mode and fronto-parietal  
456 networks, and of their reciprocal relationship. The critical novel contribution of this study is  
457 showing that the DAN, ECN and DMN are already present in neonates by full-term or term-  
458 equivalent age, and furthermore, that the reciprocal relationship between the DMN and the  
459 DAN, is already instated by this age. By contrast, this relationship is not present in preterm  
460 neonates before term-equivalent age. Our results in full-term neonates are consistent with a  
461 number of previous studies that observed high-order networks in this group (Rajasilta et al.,  
462 2020; Linke et al., 2018; He et al., 2016, 2015; Doria et al., 2010)

463

### 464 **Effect of preterm birth**

465 We found that the three networks were present in preterm neonates at TEA. Furthermore, for  
466 the first time, we show that the reciprocal relationship between the DAN and DMN was  
467 instated in preterm neonates at TEA. Previous rs-fMRI neonate studies that have investigated  
468 the effect of preterm birth have mainly focused on disrupted within-network coherence (Eyre  
469 et al., 2020; Smyser et al., 2016) or topological organization (Cao et al., 2017; van den  
470 Heuvel et al., 2015), and knowledge of the impact of preterm birth on the relationship  
471 between high-order brain networks remains scarce. It is, therefore, striking to see that this key  
472 functional relationship develops in healthy-born premature neonates by term-equivalent age,  
473 according to a pre-programmed developmental trajectory despite of prematurity.

474

475 However, premature birth had a negative impact on network development. Preterm neonates  
476 at TEA had significantly lower within-network connectivity in the DMN and DAN,  
477 suggesting that these networks were less developed relative to full-term neonates despite the  
478 matched age. Furthermore, the DAN–ECN connectivity was higher in preterm neonates at  
479 TEA, likely due to weaker within-network connectivity in the DAN. Our results are  
480 consistent with Smyser et al. (2016) and Eyre et al. (2020) findings of lower within-network  
481 connectivity in preterm relative full-term neonates. Bouyssi-Kobar et al., (2019) showed  
482 decreased density of connections in parietal-temporal and frontal areas in preterm neonates  
483 scanned at TEA relative to full-term neonates, using graph theoretical modelling. Previous

484 structural MRI studies (Bouyssi-Kobar et al., 2018; Pandit et al., 2014) also found  
485 widespread deficiencies in grey and white matter, including in the DMN regions, in preterms  
486 scanned at TEA relative to full-term neonates (Bouyssi-Kobar et al., 2018). Consistent with a  
487 growing literature, our results shed light on disrupted brain mechanisms that may underlie the  
488 significant risks for neurodevelopmental and psychiatric problems in later life (Bhutta et al.,  
489 2002; Marlow et al., 2005; Saigal and Doyle, 2008; Nosarti et al., 2012), that are associated  
490 with preterm birth.

491

### 492 **Impact of premature neonate age on network development**

493 In contrast to preterm neonates assessed at TEA, neonates who were assessed before TEA  
494 showed dramatic underdevelopment of networks and their relationships. Only the DAN, but  
495 not the ECN and DMN, was present as a discrete network. The ECN showed significant  
496 development in the early weeks post premature birth; within-network connectivity became  
497 significantly stronger as premature neonates reached TEA. Strengthening of within-network  
498 connectivity in fronto-parietal regions has been reported in previous studies that assessed  
499 preterm neonates longitudinally (He et al., 2016). These findings suggest that, relative to  
500 other high-order networks, e.g., the DMN, the ECN aspect of the fronto-parietal networks is  
501 the least developed in preterms and most liable to undergo developmental change in the early  
502 weeks post birth. Furthermore, the reciprocal relationship between the fronto-parietal and  
503 DMN networks also strengthened in the weeks up to term-equivalent age. It was not formed  
504 before TEA, but appeared once preterms reached TEA. These results present a novel finding  
505 for premature neonates. They resonate with fetal studies (Thomason et al. 2015; 2014)  
506 showing that coactivation from the posterior cingulate cortex (node of the DMN) to areas of  
507 dorsal attention/executive networks became more negatively coupled with increasing fetal  
508 age.

509

### 510 **Comparison of neonate and adult networks**

511 It is important to note that although the DAN, ECN and DMN were already present at full-  
512 term and term-equivalent age, they were significantly different from the adult networks. The  
513 neonate networks had significantly lower within-network connectivity and were atypical in  
514 their nodal structure, suggesting less within-network cohesiveness compared to the adults'.  
515 Similarly, the reciprocal relationship between the DMN and DAN was less developed in  
516 neonates relative to adults. These findings are consistent with previous studies (Sherman et  
517 al., 2014; Gao et al., 2009; Fair et al., 2007) showing that the functional organization of the



518 brain rapidly develops from birth onwards. For example, Gao et al. (2009) reported that the  
519 DMN becomes adultlike by 2 years of age. Studies have also reported significant differences  
520 in segregation and integration, indicators of functional network maturation, in the DMN and  
521 ECN between childhood and adulthood (Sherman et al., 2014; Fair et al., 2007; 2008)

522

523 Of the three high-order networks, the ECN was the least developed in premature neonates,  
524 whereas the DAN was the most well-formed across all neonate groups. These results suggest  
525 different ontogenesis trajectories for the two fronto-parietal networks, likely explained by  
526 their differential functions. The DAN serves to orient and modulate attention to the saliency  
527 of incoming sensory inputs (Corbetta and Shulman 2002), a capacity that probably emerges  
528 early in fetal development, as foetuses start to perceive sounds inside the womb. By contrast,  
529 behavioural response planning and monitoring, subserved by the ECN (Kroger et al., 2002),  
530 is a mental faculty that relies heavily on the increasingly complex interactions with their  
531 environment that neonates engage in as they mature from the first weeks and months from  
532 birth.

533

#### 534 **Methodological considerations**

535 Although some previous studies have observed high-order networks in neonates (Rajasilta et  
536 al., 2020; Linke et al., 2018; He et al., 2015, 2016; Doria et al., 2010) others have not (Gao et  
537 al., 2015a, 2015b; Fransson et al., 2007; Eyre et al, 2020). This inconsistency is likely due to  
538 methodological differences in the type of data acquired and the analyses method. By contrast  
539 to some previous studies (Gao et al., 2015a, 2015b; Fransson et al., 2007), here we were  
540 enabled by the high quality dHCP dataset to employ a uniquely large sample of high temporal  
541 and spatial resolution infant rs-fMRI data, and accurate week-by-week structural templates of  
542 the developing infant brain, which ensured higher sensitivity to detect brain networks in early  
543 infancy. Second, we used a theoretically motivated region-of-interest analysis rather than a  
544 data-driven independent component analysis (ICA) for network definition. While ICA is a  
545 convenient data-driven tool to extract networks, it requires a critical free parameter that  
546 determines how many will be extracted, and hence the degree to which brain networks are  
547 likely to be detected as whole versus broken into parts. For example, a recent paper by Eyre  
548 et al. (2020), that used the dHCP dataset, did not find a single network corresponding to the  
549 whole DMN, but it is possible that this result would have changed with a different parameter  
550 choice. Given these methodological strengths and clear results, we believe this study helps to

551 resolve previous inconsistent findings on the development of high-order brain network in  
552 neonates.

553

#### 554 **Implications for understanding conscious awareness in neonates**

555 What are the implications of our findings for understanding the conscious experiences of  
556 neonates? For the first time, here we show that by full-term birth or term-equivalent age,  
557 neonates possess key features of the brain infrastructure that enables the integration of  
558 information across diverse sensory and higher-order functional modules, which gives rise to  
559 conscious access. We also show that this system is yet to undergo substantial change before it  
560 resembles that of the adults. Therefore, while these findings suggest that the capacity for  
561 conscious experiences is present at birth, coupled with previous evidence, they suggest that  
562 such experiences may be limited. The frontal cortex, a nexus of the fronto-parietal and DMN  
563 networks, undergoes dramatic maturation and reorganization by the end of the first year of  
564 life, resulting in big improvements in several cognitive abilities, and in sophistication of  
565 related mental content at that age (Diamond and Goldman-Rakic, 1989). Consistent with  
566 neuroanatomical data, Kouider et al. (2013) found an electrophysiological signature of  
567 perceptual consciousness which was present albeit weak and delayed in 5-month-olds,  
568 became stronger and faster in 12–15-month-old infants. Kovács et al. (2010) found that  
569 infants' eye movements demonstrated a capacity to monitor other people's beliefs at 7  
570 months, and to make predictions about visual scenes at 12 months. Critically, at birth,  
571 neonates are largely bereft of the wealth of prior experiences that inform episodic memory  
572 and semantic knowledge, which allow for the construction of longitudinal awareness (Seely  
573 and Sturm, 2006; Damasio, 2000), and the creation of an internal world that projects beyond  
574 the present and is extended across time. Nevertheless, even from the first days of life,  
575 neonates encode, store, and retrieve information about events in their world (Ellis et al., 2020;  
576 Howe et al., 2004; 2003). They start to integrate sensory, kinesthetic and proprioceptive  
577 stimulus response contingencies, in order to understand the actions of others and generate  
578 models for producing similar actions. Our results suggest that from birth neonates possess the  
579 capacity to integrate sensory and incipient cognitive experiences into coherent conscious  
580 experiences about their core self and the developing relationship to their environment.

581

582 **Figures and Legends**

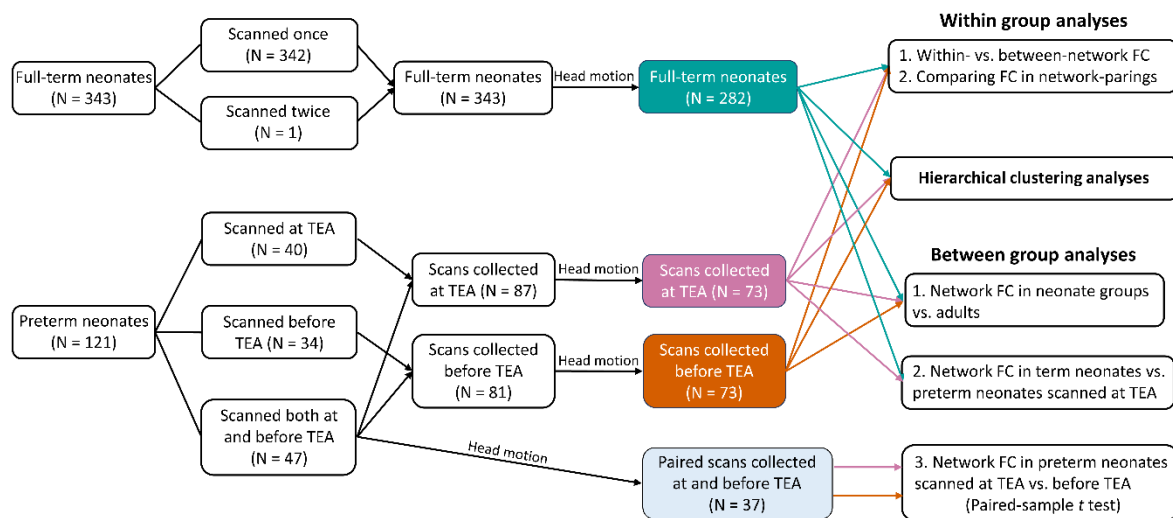

583

584 **Figure 1.** The number of scans included in data analyses. The frame in green/pink/brown  
 585 indicate the scans collected from full-term neonates/preterm neonates at/before term-  
 586 equivalent age that passed head motion criteria. The frame in light blue indicates the scans  
 587 collected at and before term-equivalent age from the same preterm neonates. Abbreviations:  
 588 TEA, term-equivalent age; vs., versus; FC, functional connectivity.

589

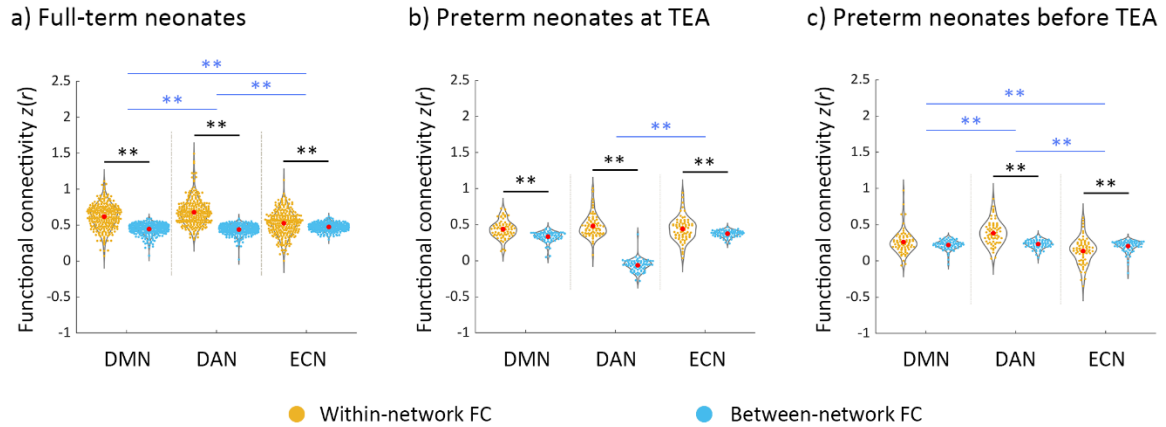

590

591 **Figure 2.** Within-network and between-network functional connectivity across DMN, DAN  
592 and ECN in the neonate groups. a) full-term neonates; b) preterm neonates scanned at term-  
593 equivalent age (TEA); c) preterm neonates scanned before TEA. The black lines/asterisks  
594 indicate significant difference between functional connectivity (FC) measures for each  
595 network, and the blue lines/asterisks indicate significant difference in FC measures of  
596 different networks. The FC values were Fisher-z transformed and inter-subject variability was  
597 removed for display purposes. Abbreviations: TEA, term-equivalent age; DMN, default mode  
598 network; DAN, dorsal attention network; ECN, executive control network; FC, functional  
599 connectivity; \*\* =  $p < 0.005$ .

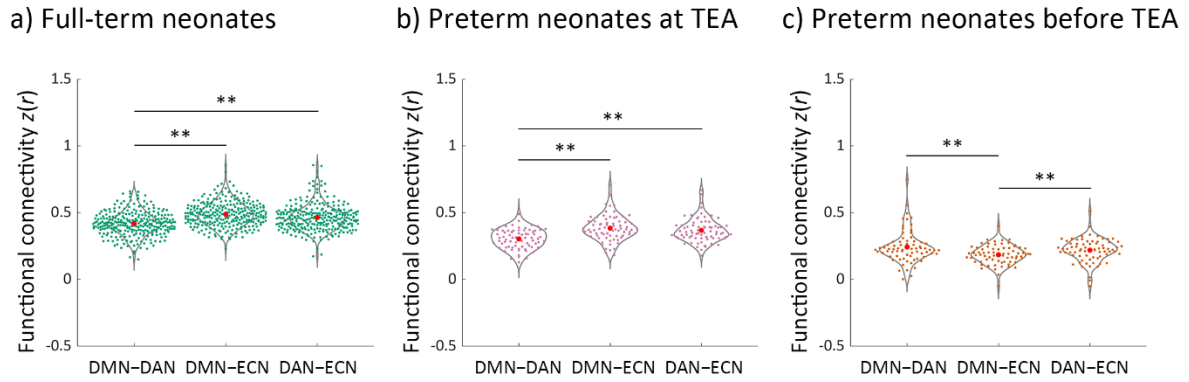

600

601 **Figure 3.** Between-network functional connectivity in neonate groups. a) full-term neonates;

602 b) preterm neonates scanned at term-equivalent age (TEA); c) preterm neonates scanned

603 before TEA. The FC values were Fisher- $z$  transformed and inter-subject variability was

604 removed for display purposes. Abbreviations: TEA, term-equivalent age; DMN-DAN, FC

605 between the default mode network and dorsal attention network; DMN-ECN, FC between

606 the default mode network and executive control network; DAN-ECN, FC between the dorsal

607 attention network and executive control network; \*\* =  $p < 0.005$ .

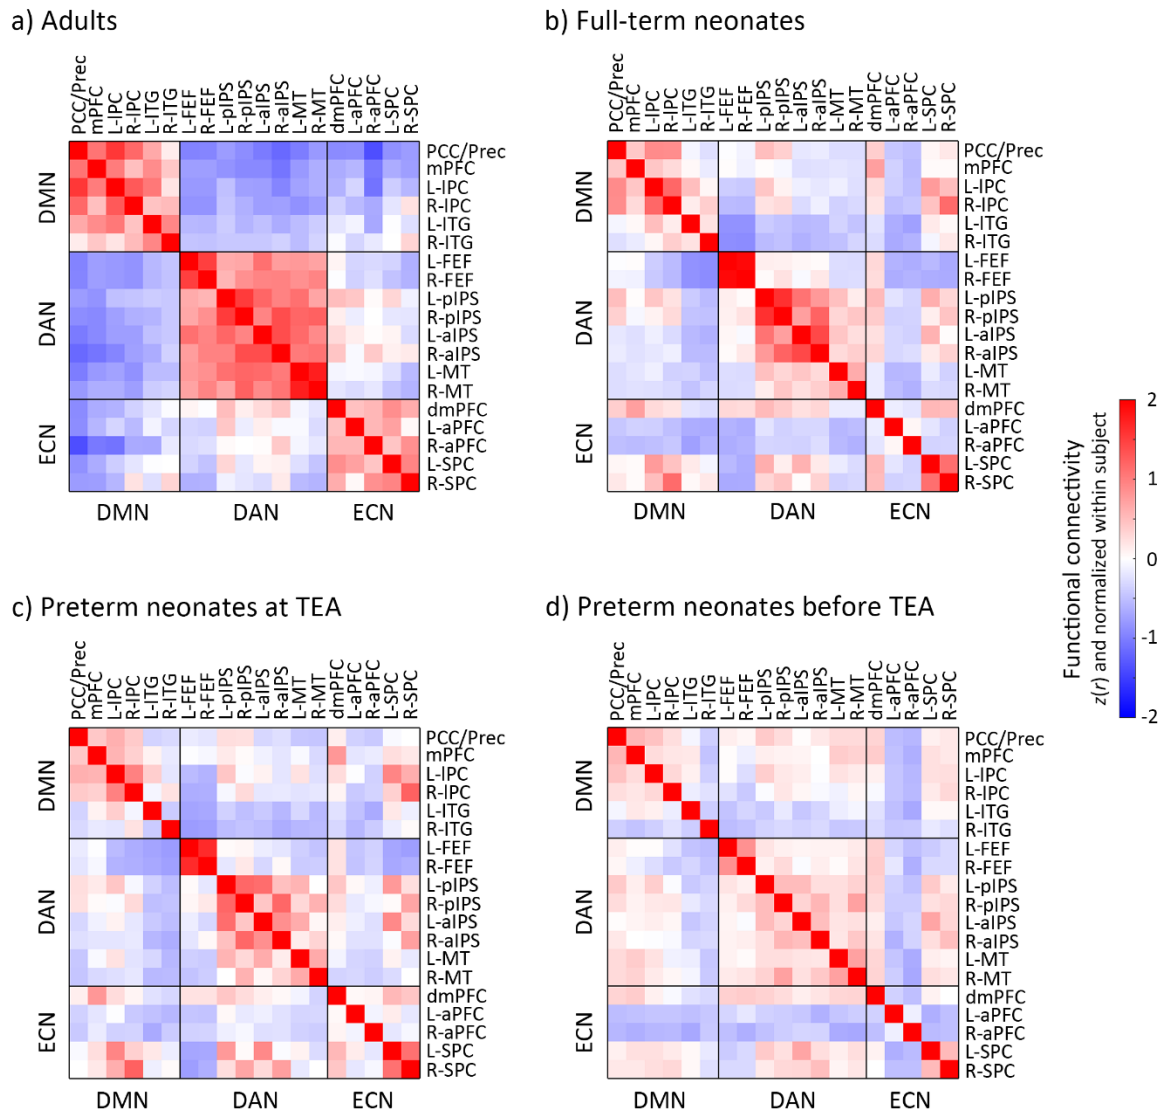

608

609 **Figure 4.** Functional connectivity (FC) in adults and neonate groups. a) adults, b) full-term  
 610 neonates, c) preterm neonates scanned at term-equivalent age (TEA) and d) preterm neonates  
 611 scanned before TEA. The FC value presents here was Fisher- $z$  transformed and normalized  
 612 within each subject before averaged within each group. Blue–red indicates low–high values.  
 613 Abbreviations: TEA, term-equivalent age; DMN, default mode network; DAN, dorsal  
 614 attention network; ECN, executive control network; R, right; L, left; PCC/Prec, posterior  
 615 cingulate cortex/precuneus; mPFC, medial prefrontal cortex; IPC, lateral parietal cortex; ITG,  
 616 inferior temporal gyrus; FEF, frontal eye field; pIPS, posterior intraparietal sulcus; aIPS,  
 617 anterior intraparietal sulcus; MT, middle temporal area; dmPFC, dorsal medial prefrontal  
 618 cortex; aPFC, anterior prefrontal cortex; SPC, superior parietal cortex.

619

a) Full-term neonates versus adults

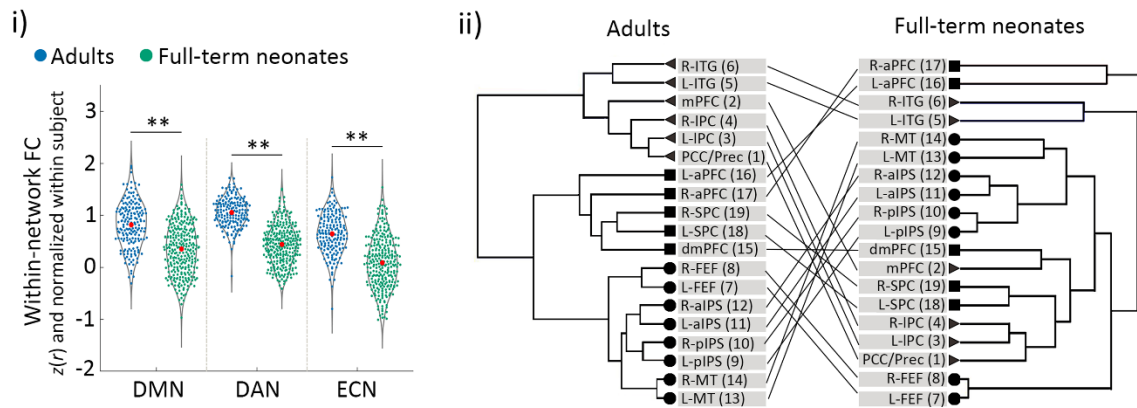

b) Preterm neonates at TEA versus adults

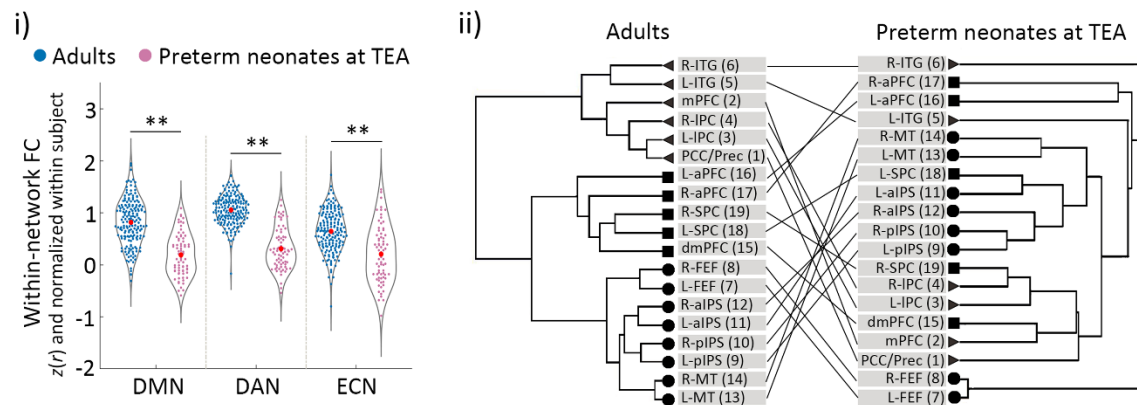

c) Preterm neonates before TEA versus adults

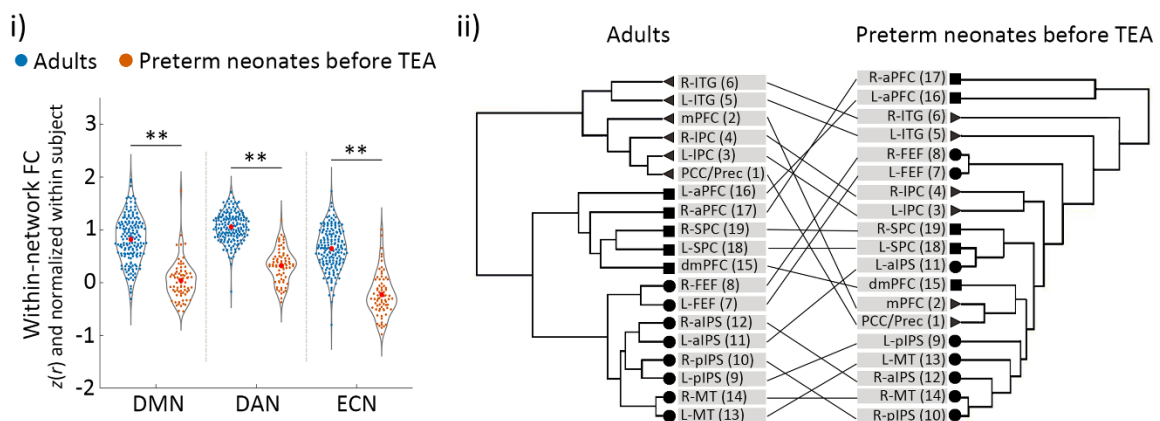

620

621 **Figure 5.** The development of the DMN, DAN and ECN in neonates relative to adults. a)  
 622 full-term neonates, b) preterm neonates scanned at term-equivalent age (TEA) and c) preterm  
 623 neonates scanned before TEA relative to the adults. Panels a-i), b-i) and c-i) depict the  
 624 comparison of within-network functional connectivity (FC) between each neonate group and  
 625 the adults. The FC values were Fisher- $z$  transformed and normalized within each subject

626 before averaging within each group. Panels a-ii), b-ii) and c-ii) depict the network structure of  
627 each neonate group relative to adults. Triangles/circles/squares represent the nodes of the  
628 DMN/DAN/ECN. Abbreviations: FC, Functional connectivity; DMN, default mode network;  
629 DAN, dorsal attention network; ECN, executive control network; R, right; L, left; PCC/Prec,  
630 posterior cingulate cortex/precuneus; mPFC, medial prefrontal cortex; IPC, lateral parietal  
631 cortex; ITG, inferior temporal gyrus; FEF, frontal eye field; pIPS, posterior intraparietal  
632 sulcus; aIPS, anterior intraparietal sulcus; MT, middle temporal area; dmPFC, dorsal medial  
633 prefrontal cortex; aPFC, anterior prefrontal cortex; SPC, superior parietal cortex; \*\* =  $p <$   
634 0.005.



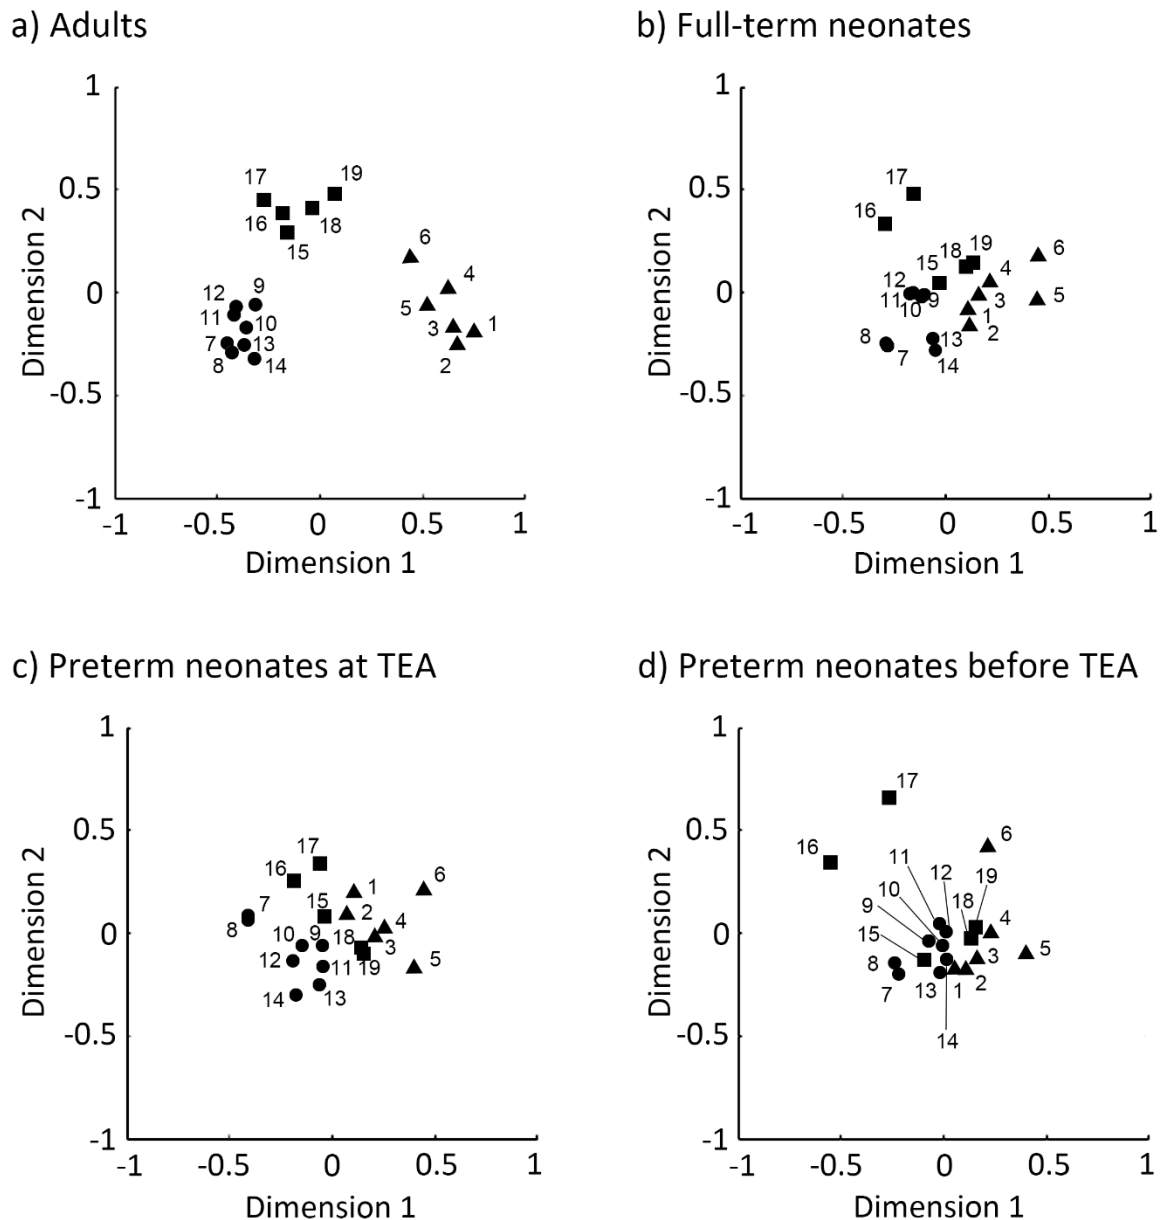

635

636 **Figure 6.** Multidimensional scaling (MDS) plots of regions in adults and neonates. a) adults,

637 b) full-term neonates, c) preterm neonates scanned at term-equivalent age (TEA) and d)

638 preterm neonates scanned before TEA. The 2-D plots were created using nonmetric MDS

639 based on node's similarity. Here triangles/circles/squares indicate nodes of the default

640 mode/dorsal attention/executive control network. Abbreviations: 1, posterior cingulate

641 cortex/precuneus; 2, medial prefrontal cortex; 3, left lateral parietal cortex; 4, right lateral

642 parietal cortex; 5, left inferior temporal gyrus; 6, right inferior temporal gyrus; 7, left frontal

643 eye field; 8, right frontal eye field; 9, left posterior intraparietal sulcus; 10, right posterior

644 intraparietal sulcus; 11, left anterior intraparietal sulcus; 12, right anterior intraparietal sulcus;

645 13, left middle temporal area; 14, right middle temporal area; 15, dorsal medial prefrontal

646 cortex; 16, left anterior prefrontal cortex; 17, right anterior prefrontal cortex; 18, left superior  
647 parietal cortex; 19, right superior parietal cortex; TEA, term-equivalent age.

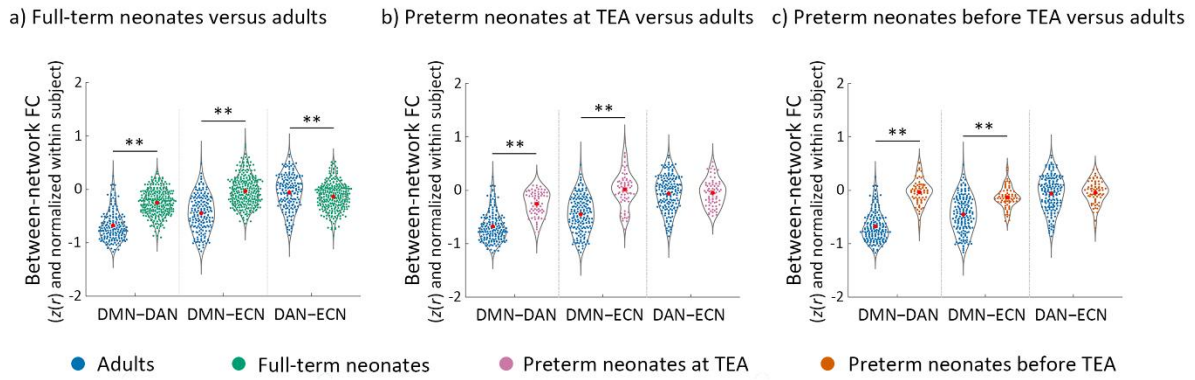

648

649 **Figure 7.** The development of the between-network functional connectivity (FC) in neonates

650 relative to adults. a) full-term neonates, b) preterm neonates scanned at term-equivalent age

651 (TEA) and c) preterm neonates scanned before TEA relative to the adults. The FC values

652 were Fisher- $z$  transformed and normalized within each subject before averaging within each

653 group. Abbreviations: FC, functional connectivity; DMN-DAN, FC between DMN and

654 DAN; DMN-ECN, FC between DMN and ECN; DAN-ECN, FC between DAN and ECN;

655 \*\* =  $p < 0.005$ .

a) Preterm neonates at TEA versus full-term neonates

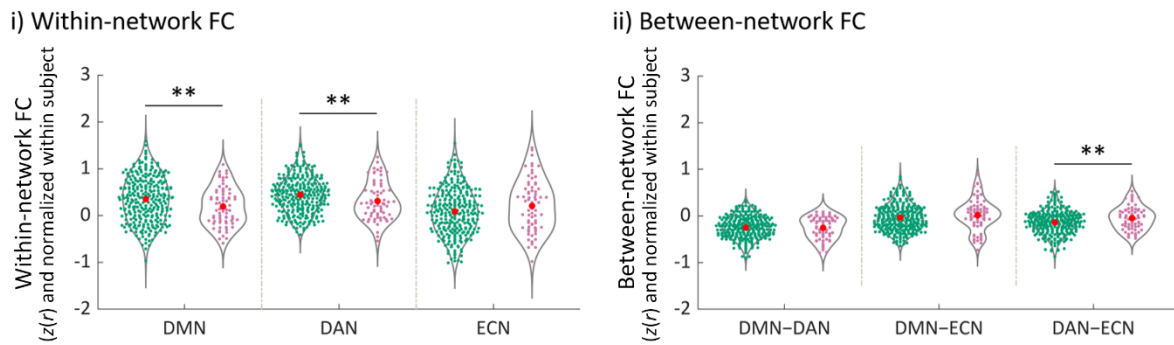

b) Preterm neonates before TEA versus preterm neonates at TEA

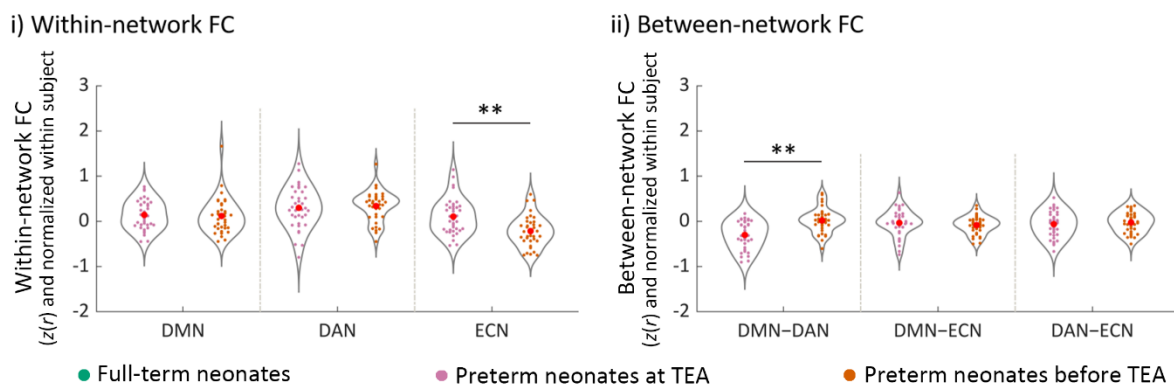

656

657 **Figure 8.** The effect of premature birth and early neonate age on the development of network

658 functional connectivity (FC). a) The effect of premature birth on a-i) within-network FC and

659 a-ii) between-network FC. The FC values represented in a-i) and a-ii) were Fisher-z

660 transformed and normalized within each subject before averaging within each group. b) The

661 effect of early neonate age on b-i) within-network FC and b-ii) between-network FC. The FC

662 values represented in b-i) and b-ii) were Fisher-z transformed, normalized within each

663 subject, and inter-subject variability was removed for display purposes. Abbreviations: DMN,

664 default mode network; DAN, dorsal attention network; ECN, executive control network;

665 DMN-DAN, FC between DMN and DAN; DMN-ECN, FC between DMN and ECN;

666 DAN-ECN, FC between DAN and ECN; \*\* =  $p < 0.005$ .

667 **Acknowledgements**

668 H.H. was funded by the China Scholarship Council – Trinity College Dublin Joint  
669 Scholarship Programme. R.C. is supported by an ERC Advanced Grant 787981  
670 (FOUNDCOG). L.N. was funded by an L’Oreal for Women In Science International Rising  
671 Talent Award, and the Wellcome Trust Institutional Strategic Support Fund. Neonate data  
672 were obtained from the Developing Human Connectome Project website  
673 (<http://www.developingconnectome.org/second-data-release/>) and adult data were obtained  
674 through the Washington University-Minnesota Consortium of Human Connectome Project  
675 website (<http://www.humanconnectomeproject.org>).

676

677 **Conflict of Interest**

678 The authors declare no conflict of interest.

679

680 **Author contributions**

681 Study Conceptualization, L.N., H.H.; Methodology, L.N., H.H., R.C.; Formal Analyses,  
682 H.H.; Writing, H.H., L.N.; Revision: R.C., L.N.; Funding and resource acquisition, L.N.  
683 Project administration, L.N.; Supervision, L.N.

684

685

686

687 **References**

- 688 Addabbo, M., Longhi, E., Marchis, I. C., Tagliabue, P., & Turati, C. (2018). Dynamic facial  
689 expressions of emotions are discriminated at birth. *PloS one*, 13(3), e0193868.
- 690 Andrews-Hanna, J. R., Reidler, J. S., Huang, C., & Buckner, R. L. (2010). Evidence for the  
691 default network's role in spontaneous cognition. *Journal of neurophysiology*, 104(1), 322-  
692 335.
- 693 Beer, J. S. (2007). The default self: feeling good or being right?. *Trends in cognitive sciences*,  
694 11(5), 187-189.
- 695 Bhutta, A. T., Cleves, M. A., Casey, P. H., Cradock, M. M., & Anand, K. J. (2002).  
696 Cognitive and behavioral outcomes of school-aged children who were born preterm: a meta-  
697 analysis. *Jama*, 288(6), 728-737.
- 698 Bonhomme, V. L. G., Boveroux, P., Brichant, J. F., Laureys, S., & Boly, M. (2012). Neural  
699 correlates of consciousness during general anesthesia using functional magnetic resonance  
700 imaging (fMRI). *Archives italiennes de biologie*, 150(2/3), 155-163.
- 701 Bouyssi-Kobar, M., De Asis-Cruz, J., Murnick, J., Chang, T., & Limperopoulos, C. (2019).  
702 Altered Functional Brain Network Integration, Segregation, and Modularity in Infants Born  
703 Very Preterm at Term-Equivalent Age. *The Journal of pediatrics*, 213, 13-21.
- 704 Bouyssi-Kobar, M., Brossard-Racine, M., Jacobs, M., Murnick, J., Chang, T., &  
705 Limperopoulos, C. (2018). Regional microstructural organization of the cerebral cortex is  
706 affected by preterm birth. *NeuroImage: Clinical*, 18, 871-880.
- 707 Buckner, R. L., & Carroll, D. C. (2007). Self-projection and the brain. *Trends in cognitive*  
708 *sciences*, 11(2), 49-57.
- 709 Cao, M., Huang, H., & He, Y. (2017). Developmental connectomics from infancy through  
710 early childhood. *Trends in neurosciences*, 40(8), 494-506.
- 711 Clare, L., Marková, I., Verhey, F., & Kenny, G. (2005). Awareness in dementia: a review of  
712 assessment methods and measures. *Aging & Mental Health*, 9(5), 394-413.
- 713 Corbetta, M. & Shulman, G. L. (2002) Control of goal-directed and stimulus-driven attention  
714 in the brain. *Nat. Rev. Neurosci.* 3, 201–215.
- 715 Cusack, R., Ball, G., Smyser, C. D., & Dehaene-Lambertz, G. (2016). A neural window on  
716 the emergence of cognition. *Annals of the New York Academy of Sciences*, 1369(1), 7.
- 717 Cui, J., Tymofiyeva, O., Desikan, R., Flynn, T., Kim, H., Gano, D., ... & Xu, D. (2017).  
718 Microstructure of the default mode network in preterm infants. *American Journal of*  
719 *Neuroradiology*, 38(2), 343-348.

- 720 Damasio, A. R. (2000). A neurobiology for consciousness. *Neural correlates of*  
721 *consciousness: Empirical and conceptual questions*, 111-120.
- 722 D'Argembeau, A., Collette, F., Van der Linden, M., Laureys, S., Del Fiore, G., Degueldre, C.,  
723 ... & Salmon, E. (2005). Self-referential reflective activity and its relationship with rest: a  
724 PET study. *Neuroimage*, 25(2), 616-624.
- 725 DeCasper, A. J., & Fifer, W. P. (1980). Of human bonding: Newborns prefer their mothers'  
726 voices. *Science*, 208(4448), 1174-1176.
- 727 Dehaene, S., Changeux, J. P., & Naccache, L. (2011). The global neuronal workspace model  
728 of conscious access: from neuronal architectures to clinical applications. In *Characterizing*  
729 *consciousness: From cognition to the clinic?* (pp. 55-84). Springer, Berlin, Heidelberg.
- 730 Demertzi, A., Soddu, A., & Laureys, S. (2013). Consciousness supporting networks. *Current*  
731 *opinion in neurobiology*, 23(2), 239-244.
- 732 Diamond, A., & Goldman-Rakic, P. S. (1989). Comparison of human infants and rhesus  
733 monkeys on Piaget's AB task: Evidence for dependence on dorsolateral prefrontal cortex.  
734 *Experimental brain research*, 74(1), 24-40.
- 735 Doria, V., Beckmann, C. F., Arichi, T., Merchant, N., Groppo, M., Turkheimer, F. E., ... &  
736 Larkman, D. J. (2010). Emergence of resting state networks in the preterm human brain.  
737 *Proceedings of the National Academy of Sciences*, 107(46), 20015-20020.
- 738 Duncan, J. (2010). The multiple-demand (MD) system of the primate brain: mental programs  
739 for intelligent behaviour. *Trends in cognitive sciences*, 14(4), 172-179.
- 740 Elliott, R. (2003). Executive functions and their disorders: Imaging in clinical neuroscience.  
741 *British medical bulletin*, 65(1), 49-59.
- 742 Ellis, C. T., Skalaban, L. J., Yates, T. S., Bejjanki, V. R., Córdova, N. I., & Turk-Browne, N.  
743 B. (2020). Evidence of hippocampal learning in human infants. *bioRxiv*.
- 744 Eyre, M., Fitzgibbon, S. P., Ciarrusta, J., Cordero-Grande, L., Price, A. N., Poppe, T., ... &  
745 Cromb, D. (2020). The Developing Human Connectome Project: typical and disrupted  
746 perinatal functional connectivity. *BioRxiv*.
- 747 Fair, D. A., Dosenbach, N. U., Church, J. A., Cohen, A. L., Brahmbhatt, S., Miezin, F. M., ...  
748 & Schlaggar, B. L. (2007). Development of distinct control networks through segregation and  
749 integration. *Proceedings of the National Academy of Sciences*, 104(33), 13507-13512.
- 750 Fair, D. A., Cohen, A. L., Dosenbach, N. U., Church, J. A., Miezin, F. M., Barch, D. M., ... &  
751 Schlaggar, B. L. (2008). The maturing architecture of the brain's default network.  
752 *Proceedings of the National Academy of Sciences*, 105(10), 4028-4032.

- 753 Filippetti, M. L., Johnson, M. H., Lloyd-Fox, S., Dragovic, D., & Farroni, T. (2013). Body  
754 perception in newborns. *Current Biology*, 23(23), 2413-2416.
- 755 Fitzgibbon, S. P., Harrison, S. J., Jenkinson, M., Baxter, L., Robinson, E. C., Bastiani, M., ...  
756 & Andersson, J. (2020). The developing Human Connectome Project (dHCP) automated  
757 resting-state functional processing framework for newborn infants. *NeuroImage*, 223,  
758 117303.
- 759 Fransson, P., Skiöld, B., Horsch, S., Nordell, A., Blennow, M., Lagercrantz, H., & Åden, U.  
760 (2007). Resting-state networks in the infant brain. *Proceedings of the National Academy of*  
761 *Sciences*, 104(39), 15531-15536.
- 762 Fransson, P., Skiöld, B., Engström, M., Hallberg, B., Mosskin, M., Åden, U., ... & Blennow,  
763 M. (2009). Spontaneous brain activity in the newborn brain during natural sleep—an fMRI  
764 study in infants born at full term. *Pediatric research*, 66(3), 301-305.
- 765 Gallagher, S. (2000). Philosophical conceptions of the self: implications for cognitive  
766 science. *Trends in cognitive sciences*, 4(1), 14-21.
- 767 Gao, W., Zhu, H., Giovanello, K. S., Smith, J. K., Shen, D., Gilmore, J. H., & Lin, W. (2009).  
768 Evidence on the emergence of the brain's default network from 2-week-old to 2-year-old  
769 healthy pediatric subjects. *Proceedings of the National Academy of Sciences*, 106(16), 6790-  
770 6795.
- 771 Gao, W., Gilmore, J. H., Shen, D., Smith, J. K., Zhu, H., & Lin, W. (2013). The  
772 synchronization within and interaction between the default and dorsal attention networks in  
773 early infancy. *Cerebral cortex*, 23(3), 594-603.
- 774 Gao, W., Alcauter, S., Elton, A., Hernandez-Castillo, C. R., Smith, J. K., Ramirez, J., & Lin,  
775 W. (2015a). Functional network development during the first year: relative sequence and  
776 socioeconomic correlations. *Cerebral cortex*, 25(9), 2919-2928.
- 777 Gao, W., Alcauter, S., Smith, J. K., Gilmore, J. H., & Lin, W. (2015b). Development of  
778 human brain cortical network architecture during infancy. *Brain Structure and Function*,  
779 220(2), 1173-1186.
- 780 Gusnard, D. A., & Raichle, M. E. (2001). Searching for a baseline: functional imaging and  
781 the resting human brain. *Nature reviews neuroscience*, 2(10), 685-694.
- 782 Haugg, A., Cusack, R., Gonzalez-Lara, L. E., Sorger, B., Owen, A. M., & Naci, L. (2018).  
783 Do patients thought to lack consciousness retain the capacity for internal as well as external  
784 awareness?. *Frontiers in neurology*, 9, 492.



- 785 He, L., & Parikh, N. A. (2015). Aberrant executive and frontoparietal functional connectivity  
786 in very preterm infants with diffuse white matter abnormalities. *Pediatric neurology*, 53(4),  
787 330-337.
- 788 He, L., & Parikh, N. A. (2016). Brain functional network connectivity development in very  
789 preterm infants: the first six months. *Early human development*, 98, 29-35.
- 790 Howe, M. L., Courage, M. L., & Edison, S. C. (2003). When autobiographical memory  
791 begins. *Developmental Review*, 23(4), 471-494.
- 792 Howe, M. L., & Courage, M. L. (2004). Demystifying the beginnings of memory.  
793 *Developmental Review*, 24(1), 1-5.
- 794 Huang, Z., Zhang, J., Wu, J., Mashour, G. A., & Hudetz, A. G. (2020). Temporal circuit of  
795 macroscale dynamic brain activity supports human consciousness. *Science advances*, 6(11),  
796 eaaz0087.
- 797 Hüppi, P. S., Warfield, S., Kikinis, R., Barnes, P. D., Zientara, G. P., Jolesz, F. A., ... &  
798 Volpe, J. J. (1998). Quantitative magnetic resonance imaging of brain development in  
799 premature and mature newborns. *Annals of Neurology: Official Journal of the American*  
800 *Neurological Association and the Child Neurology Society*, 43(2), 224-235.
- 801 Ito, T., Brincat, S. L., Siegel, M., Mill, R. D., He, B. J., Miller, E. K., ... & Cole, M. W.  
802 (2020). Task-evoked activity quenches neural correlations and variability across cortical  
803 areas. *PLoS computational biology*, 16(8), e1007983.
- 804 Keunen, K., Counsell, S. J., & Benders, M. J. (2017). The emergence of functional  
805 architecture during early brain development. *Neuroimage*, 160, 2-14.
- 806 Kouider, S., Stahlhut, C., Gelskov, S. V., Barbosa, L. S., Dutat, M., de Gardelle, V., ... &  
807 Dehaene-Lambertz, G. (2013). A neural marker of perceptual consciousness in infants.  
808 *Science*, 340(6130), 376-380.
- 809 Kovács, Á. M., Téglás, E., & Endress, A. D. (2010). The social sense: Susceptibility to  
810 others' beliefs in human infants and adults. *Science*, 330(6012), 1830-1834.
- 811 Kroger, J. K. et al. (2002) Recruitment of anterior dorsolateral prefrontal cortex in human  
812 reasoning: a parametric study of relational complexity. *Cerebral cortex* 12(5), 477-485
- 813 Laureys, S., Owen, A. M., & Schiff, N. D. (2004). Brain function in coma, vegetative state,  
814 and related disorders. *The Lancet Neurology*, 3(9), 537-546.
- 815 Lin, W., Zhu, Q., Gao, W., Chen, Y., Toh, C. H., Styner, M., ... & Gilmore, J. H. (2008).  
816 Functional connectivity MR imaging reveals cortical functional connectivity in the  
817 developing brain. *American Journal of Neuroradiology*, 29(10), 1883-1889.

- 818 Liu, W. C., Flax, J. F., Guise, K. G., Sukul, V., & Benasich, A. A. (2008). Functional  
819 connectivity of the sensorimotor area in naturally sleeping infants. *Brain research*, 1223, 42-  
820 49.
- 821 Linke, A. C., Wild, C., Zubiaurre-Elorza, L., Herzmann, C., Duffy, H., Han, V. K., ... &  
822 Cusack, R. (2018). Disruption to functional networks in neonates with perinatal brain injury  
823 predicts motor skills at 8 months. *NeuroImage: Clinical*, 18, 399-406.
- 824 Limperopoulos, C., Soul, J. S., Gauvreau, K., Huppi, P. S., Warfield, S. K., Bassan, H., ... &  
825 du Plessis, A. J. (2005). Late gestation cerebellar growth is rapid and impeded by premature  
826 birth. *Pediatrics*, 115(3), 688-695.
- 827 Marlow, N., Wolke, D., Bracewell, M. A., & Samara, M. (2005). Neurologic and  
828 developmental disability at six years of age after extremely preterm birth. *New England*  
829 *journal of medicine*, 352(1), 9-19.
- 830 Martin, G. B., & Clark, R. D. (1982). Distress crying in neonates: Species and peer  
831 specificity. *Developmental psychology*, 18(1), 3.
- 832 Margulies, D. S., Ghosh, S. S., Goulas, A., Falkiewicz, M., Huntenburg, J. M., Langs, G., ...  
833 & Jefferies, E. (2016). Situating the default-mode network along a principal gradient of  
834 macroscale cortical organization. *Proceedings of the National Academy of Sciences*, 113(44),  
835 12574-12579.
- 836 Mashour, G. A., Roelfsema, P., Changeux, J. P., & Dehaene, S. (2020). Conscious processing  
837 and the global neuronal workspace hypothesis. *Neuron*, 105(5), 776-798.
- 838 Mehling, W. E., Gopisetty, V., Daubenmier, J., Price, C. J., Hecht, F. M., & Stewart, A.  
839 (2009). Body awareness: construct and self-report measures. *PloS one*, 4(5), e5614.
- 840 Naci, L., Cusack, R., Anello, M., & Owen, A. M. (2014). A common neural code for similar  
841 conscious experiences in different individuals. *Proceedings of the National Academy of*  
842 *Sciences*, 111(39), 14277-14282.
- 843 Naci, L., Haugg, A., MacDonald, A., Anello, M., Houldin, E., Naqshbandi, S., ... & Owen, A.  
844 M. (2018). Functional diversity of brain networks supports consciousness and verbal  
845 intelligence. *Scientific reports*, 8(1), 1-15.
- 846 Nosarti, C., Reichenberg, A., Murray, R. M., Cnattingius, S., Lambe, M. P., Yin, L., ... &  
847 Hultman, C. M. (2012). Preterm birth and psychiatric disorders in young adult life. *Archives*  
848 *of general psychiatry*, 69(6), 610-617.
- 849 Ockleford, E. M., Vince, M. A., Layton, C., & Reader, M. R. (1988). Responses of neonates  
850 to parents' and others' voices. *Early human development*, 18(1), 27-36.

851 Pandit, A. S., Robinson, E., Aljabar, P., Ball, G., Gousias, I. S., Wang, Z., ... & Edwards, A.  
852 D. (2014). Whole-brain mapping of structural connectivity in infants reveals altered  
853 connection strength associated with growth and preterm birth. *Cerebral cortex*, 24(9), 2324-  
854 2333.

855 Ptak, R. (2012). The frontoparietal attention network of the human brain: action, saliency,  
856 and a priority map of the environment. *The Neuroscientist*, 18(5), 502-515.

857 Qin, P., & Northoff, G. (2011). How is our self related to midline regions and the default-  
858 mode network?. *Neuroimage*, 57(3), 1221-1233.

859 Querleu, D., Lefebvre, C., Titran, M., Renard, X., Morillion, M., & Crepin, G. (1984).  
860 Reaction of the newborn infant less than 2 hours after birth to the maternal voice. *Journal de*  
861 *gynécologie, obstétrique et biologie de la reproduction*, 13(2), 125.

862 Raichle, M. E. (2011). The restless brain. *Brain connectivity*, 1(1), 3-12.

863 Rasmussen, E. M. (1992). Clustering algorithms. *Information retrieval: data structures &*  
864 *algorithms*, 419, 442.

865 Ripley, B. D. (2007). Pattern recognition and neural networks. *Cambridge university press*.

866 Ruffman, T., Then, R., Cheng, C., & Imuta, K. (2019). Lifespan differences in emotional  
867 contagion while watching emotion-eliciting videos. *PloS one*, 14(1).

868 Saigal, S., & Doyle, L. W. (2008). An overview of mortality and sequelae of preterm birth  
869 from infancy to adulthood. *The Lancet*, 371(9608), 261-269.

870 Salvador, R., Martinez, A., Pomarol-Clotet, E., Gomar, J., Vila, F., Sarró, S., ... & Bullmore,  
871 E. (2008). A simple view of the brain through a frequency-specific functional connectivity  
872 measure. *Neuroimage*, 39(1), 279-289.

873 Schneider, F., Bermpohl, F., Heinzl, A., Rotte, M., Walter, M., Tempelmann, C., ... &  
874 Northoff, G. (2008). The resting brain and our self: self-relatedness modulates resting state  
875 neural activity in cortical midline structures. *Neuroscience*, 157(1), 120-131.

876 Seeley, W. W., & Sturm, V. E. (2006). Self-representation and the frontal lobes. In: Miller  
877 BL & Cummings JL, eds. *The human frontal lobes: Functions and disorders*, 2nd ed. New  
878 York: The Guilford Press; 2006:317-334.

879 Sherman, L. E., Rudie, J. D., Pfeifer, J. H., Masten, C. L., McNealy, K., & Dapretto, M.  
880 (2014). Development of the default mode and central executive networks across early  
881 adolescence: a longitudinal study. *Developmental cognitive neuroscience*, 10, 148-159.

882 Shallice, T. (1988). From neuropsychology to mental structure. *Cambridge University Press*.

883 Simner, M. L. (1971). Newborn's response to the cry of another infant. *Developmental*  
884 *psychology*, 5(1), 136.

885 Smith, V., Mitchell, D. J., & Duncan, J. (2018). Role of the default mode network in  
886 cognitive transitions. *Cerebral Cortex*, 28(10), 3685-3696.

887 Smyser, C. D., Inder, T. E., Shimony, J. S., Hill, J. E., Degnan, A. J., Snyder, A. Z., & Neil,  
888 J. J. (2010). Longitudinal analysis of neural network development in preterm infants.  
889 *Cerebral cortex*, 20(12), 2852-2862.

890 Smyser, C. D., Snyder, A. Z., Shimony, J. S., Mitra, A., Inder, T. E., & Neil, J. J. (2016).  
891 Resting-state network complexity and magnitude are reduced in prematurely born infants.  
892 *Cerebral cortex*, 26(1), 322-333.

893 Sturm, V. E., Hua, A. Y., & Rosen, H. J. (2017). Self-Awareness and Frontal Lobe Networks.  
894 *The Human Frontal Lobes: Functions and Disorders*, 171.

895 Thomason, M. E., Brown, J. A., Dassanayake, M. T., Shastri, R., Marusak, H. A., Hernandez-  
896 Andrade, E., ... & Romero, R. (2014). Intrinsic functional brain architecture derived from  
897 graph theoretical analysis in the human fetus. *PLoS one*, 9(5), e94423.

898 Thomason, M. E., Grove, L. E., Lozon Jr, T. A., Vila, A. M., Ye, Y., Nye, M. J., ... & Mody,  
899 S. (2015). Age-related increases in long-range connectivity in fetal functional neural  
900 connectivity networks in utero. *Developmental cognitive neuroscience*, 11, 96-104.

901 Tononi, G. (2004). An information integration theory of consciousness. *BMC neuroscience*,  
902 5(1), 1-22.

903 Triantafyllou, C., Hoge, R. D., Krueger, G., Wiggins, C. J., Potthast, A., Wiggins, G. C., &  
904 Wald, L. L. (2005). Comparison of physiological noise at 1.5 T, 3 T and 7 T and optimization  
905 of fMRI acquisition parameters. *Neuroimage*, 26(1), 243-250.

906 Turk, E., van den Heuvel, M. I., Benders, M. J., de Heus, R., Franx, A., Manning, J. H., ... &  
907 Kahn, R. S. (2019). Functional connectome of the fetal brain. *Journal of Neuroscience*,  
908 39(49), 9716-9724.

909 Van Essen, D. C., Smith, S. M., Barch, D. M., Behrens, T. E., Yacoub, E., Ugurbil, K., &  
910 Wu-Minn HCP Consortium. (2013). The WU-Minn human connectome project: an overview.  
911 *Neuroimage*, 80, 62-79.

912 van den Heuvel, M. P., Kersbergen, K. J., de Reus, M. A., Keunen, K., Kahn, R. S.,  
913 Groenendaal, F., ... & Benders, M. J. (2015). The neonatal connectome during preterm brain  
914 development. *Cerebral cortex*, 25(9), 3000-3013.

915 Vanhaudenhuyse, A., Demertzi, A., Schabus, M., Noirhomme, Q., Bredart, S., Boly, M., ... &  
916 Laureys, S. (2011). Two distinct neuronal networks mediate the awareness of environment  
917 and of self. *Journal of cognitive neuroscience*, 23(3), 570-578.

- 918 Vatansever, D., Manktelow, A., Sahakian, B. J., Menon, D. K., & Stamatakis, E. A. (2018).  
919 Default mode network engagement beyond self-referential internal mentation. *Brain*  
920 *Connectivity*, 8(4), 245-253.
- 921 Weiskopf, N., Hutton, C., Josephs, O., & Deichmann, R. (2006). Optimal EPI parameters for  
922 reduction of susceptibility-induced BOLD sensitivity losses: a whole-brain analysis at 3 T  
923 and 1.5 T. *Neuroimage*, 33(2), 493-504.
- 924 Wicker, B., Ruby, P., Royet, J. P., & Fonlupt, P. (2003). A relation between rest and the self  
925 in the brain?. *Brain Research Reviews*, 43(2), 224-230.
- 926 Woolgar, A., Parr, A., Cusack, R., Thompson, R., Nimmo-Smith, I., Torralva, T., ... &  
927 Duncan, J. (2010). Fluid intelligence loss linked to restricted regions of damage within frontal  
928 and parietal cortex. *Proceedings of the National Academy of Sciences*, 107(33), 14899-14902.
- 929 Zhang, H., Shen, D., & Lin, W. (2019). Resting-state functional MRI studies on infant brains:  
930 A decade of gap-filling efforts. *NeuroImage*, 185, 664-684.
- 931 Zuo, X. N., Di Martino, A., Kelly, C., Shehzad, Z. E., Gee, D. G., Klein, D. F., ... & Milham,  
932 M. P. (2010). The oscillating brain: complex and reliable. *Neuroimage*, 49(2), 1432-1445.  
933
